# Supplementary material for: A robust indium–porphyrin framework for CO2 capture and chemical transformation
Source: Royal Society of Chemistry journal article supplement (doi:10.1039/c6dt03651a), 2016-01-01
Supplement: c6dt03651a1.pdf [file c6dt03651a1.pdf]

Support Information for

## **A Robust Indium-Porphyrin Framework for CO<sub>2</sub> Capture and Chemical Transformation**

Lei Xu,<sup>a</sup> Meng-Ke Zhai,<sup>a</sup> Xin-Chao Lu,<sup>a</sup> Hong-Bin Du<sup>a\*</sup>

<sup>a</sup> State Key Laboratory of Coordination Chemistry, Collaborative Innovation Center of Chemistry for Life Sciences, School of Chemistry and Chemical Engineering, Nanjing University, Nanjing, 210023, China. E-mail: hbdu@nju.edu.cn

### **Table of Contents**

- S1.** Optical and SEM images of the obtained NUPF-3 crystals.
- S2.** PXRD pattern of as-synthesized NUPF-3.
- S3.** FT-IR spectra of NUPF-3.
- S4.** Solid-state UV-Vis spectra of NUPF-3.
- S5.** Channels in NUPF-3.
- S6.** N<sub>2</sub> adsorption/desorption isotherms of NUPF-3.
- S7.** Dye adsorption experiments of NUPF-3.
- S8.** Catalytic reactions.
- S9.** Table S1 Crystal data for NUPF-3.
- S10.** References.

**S1. Optical and SEM images of the obtained NUPF-3 crystals.**

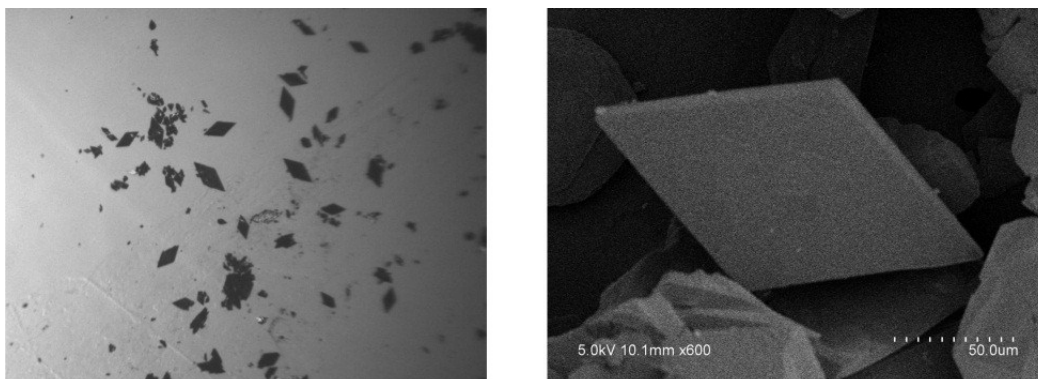

**Fig. S1** Optical and SEM images of the obtained NUPF-3 crystals.

**S2. PXRD pattern of as-synthesized NUPF-3.**

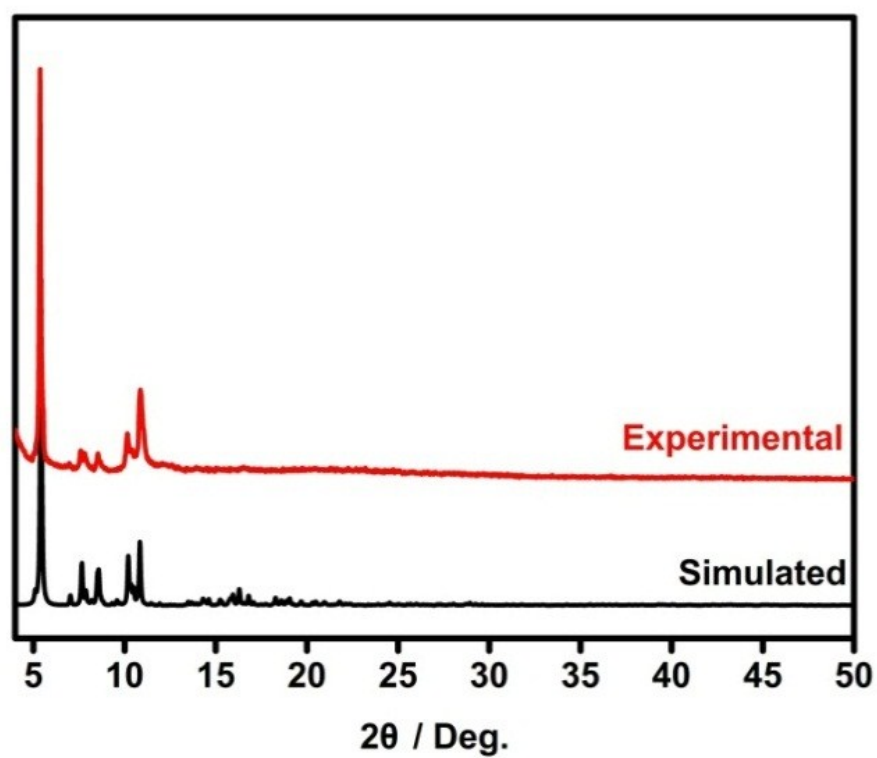

**Fig. S2** PXRD patterns of NUPF-3.

### S3. FT-IR spectra of NUPF-3.

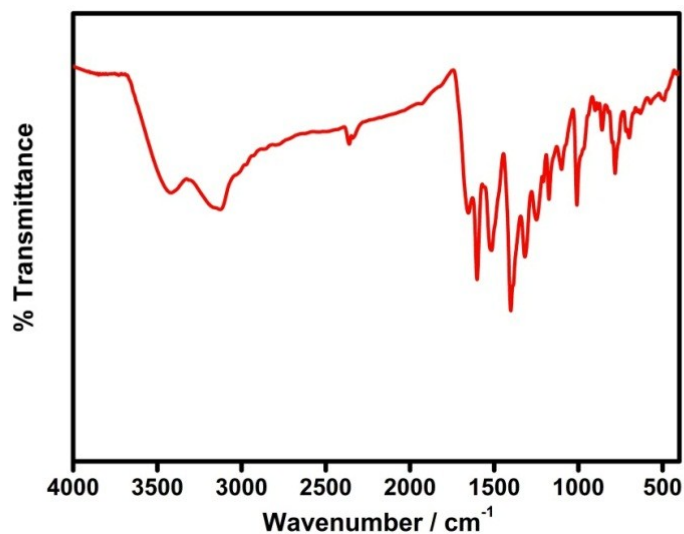

**Fig. S3** FT-IR spectra of NUPF-3 measured at room-temperature.

### S4. Solid-state UV-Vis spectra of NUPF-3.

As shown in Fig. S4, the band at 390 nm was attributed to the S band of porphyrin ligands in NUPF-3. The bands at *ca.* 508 and 590 nm were ascribed to the Q bands.

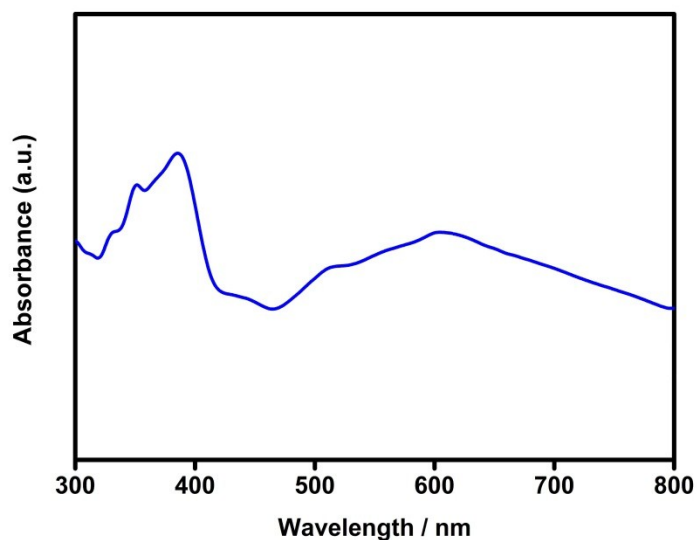

**Fig. S4** Solid-state UV-Vis spectrum of NUPF-3.

### S5. Channels in NUPF-3.

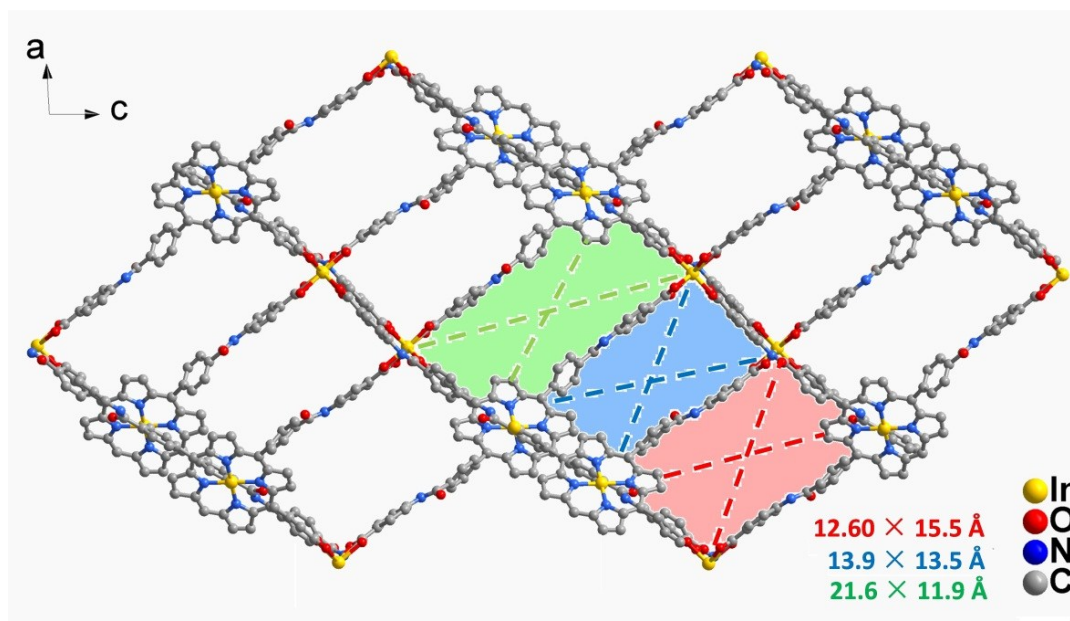

**Fig. S5** Rhombic channels propagate along the *b*-axis in NUPF-3. The distances were atom to atom distances.

#### S6. N<sub>2</sub> adsorption/desorption isotherms of NUPF-3.

N<sub>2</sub> adsorption/desorption isotherms of NUPF-3 were measured after the sample activated by super-critical carbon dioxide (SCD). The BET surface area and pore volume determined by N<sub>2</sub> adsorption were 38 m<sup>2</sup>/g and 0.018 cm<sup>3</sup>/g, respectively. The limited N<sub>2</sub> adsorption of NUPF-3 indicates its very low affinity toward N<sub>2</sub>.

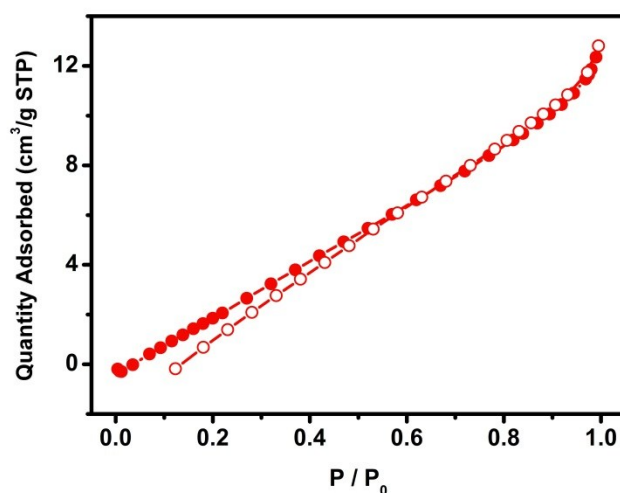

**Fig. S6** N<sub>2</sub> adsorption/desorption isotherms of NUPF-3 measured at 77 K.

#### S7. Dye adsorption experiments of NUPF-3.

In order to confirm the anionic nature of NUPF-3, a dye adsorption experiment was performed. 10 mg dry NUPF-3 samples were added into 5 mL 0.12 mM methyl orange (MO) and methyl violet (MV) solutions, respectively. The mixtures were shaken via a shaker at 180 rpm for 12 hours. Results indicate that NUPF-3 has strong adsorption toward cationic MV and no adsorption of anionic MO (Fig. S7). The selective adsorption of cationic dye clearly demonstrates the anionic nature of NUPF-3.

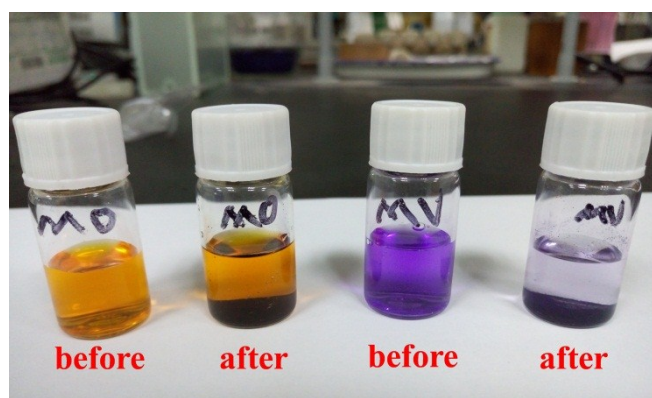

**Fig. S7** Results of dye adsorption experiments of NUPF-3.

#### **S8.** Catalytic reactions.

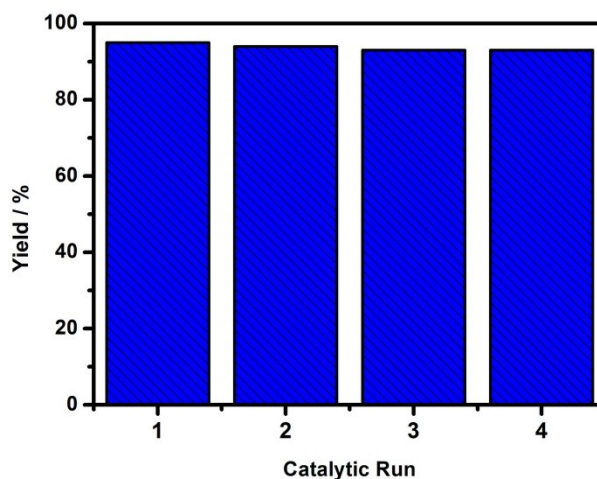

**Fig. S8** Recycle experiments of NUPF-3 for the cycloaddition of CO<sub>2</sub> with 2-methyloxirane.

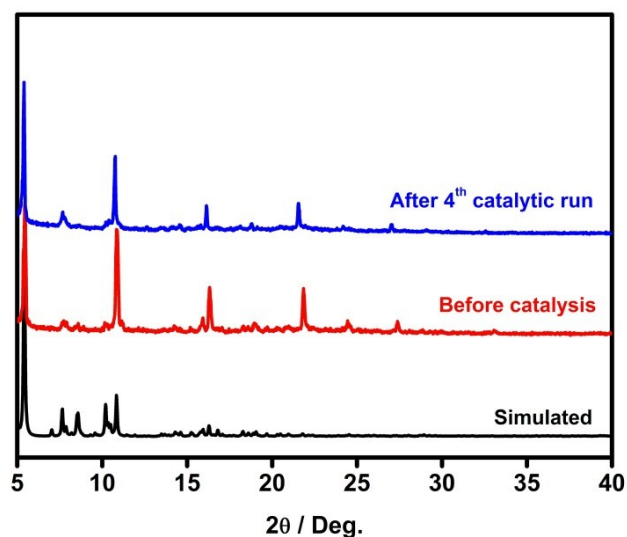

Fig. S9 PXRD patterns of NUPF-3 before and after 4<sup>th</sup> catalytic run.

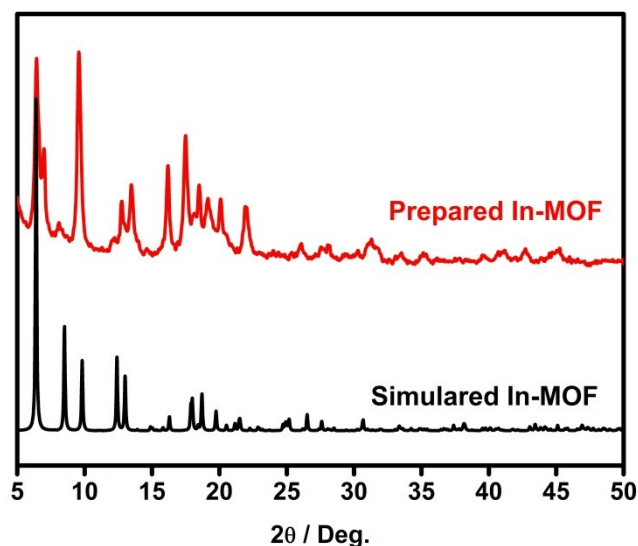

Fig. S10 PXRD patterns of In-MOF simulated and as-synthesized.

#### <sup>1</sup>H NMR characterization data:

**4-Methyl-1,3-dioxolan-2-one:** colorless oil. <sup>1</sup>H NMR (CDCl<sub>3</sub>, 300 MHz)  $\delta$  1.45 (d, 3H), 3.95-3.99 (m, 1H), 4.50-4.56 (m, 1H), 4.79-4.87 (m, 1H).

**4-Chloromethyl-1,3-dioxolan-2-one:** colorless oil. <sup>1</sup>H NMR (CDCl<sub>3</sub>, 300 MHz)  $\delta$  3.65-3.80 (m, 2H), 4.35 (dd, 1H), 4.54 (t, 1H), 4.69-5.0 (m, 1H).

**Tetrahydro-4H-cyclopenta[d][1,3]dioxol-2-one:** colorless oil. <sup>1</sup>H NMR (CDCl<sub>3</sub>, 300 MHz)  $\delta$  1.61-1.80 (m, 4H), 2.03-2.08 (m, 2H), 5.10 (m, 2H).

**4-Phenyl-1,3-dioxolan-2-one:** white solid. <sup>1</sup>H NMR (CDCl<sub>3</sub>, 300 MHz)  $\delta$  4.21 (t, 1H), 4.65 (t, 1H), 5.60 (t, 1H), 7.25-7.30 (m, 2H), 7.26-7.31 (m, 3H).

**4-Ethyl-1,3-dioxolan-2-one:** white solid. <sup>1</sup>H NMR (CDCl<sub>3</sub>, 300 MHz)  $\delta$  0.96 (t, 3H), 1.72 (m, 2H), 4.08 (m, 1H), 4.48-4.55 (m, 1H), 4.60-4.70 (m, 1H).

**4-n-Butyl-1,3-dioxolan-2-one:** yellow oil.  $^1\text{H}$  NMR ( $\text{CDCl}_3$ , 300 MHz)  $\delta$  0.87 (t, 3H), 1.31-1.38 (m, 4H), 1.63-1.73 (m, 2H), 3.39-4.05 (m, 1H), 4.47-4.53 (m, 1H) 4.65-4.70 (m, 1H).

**4-((Allyloxy)methyl)-1,3-dioxolan-2-one:** colorless oil.  $^1\text{H}$  NMR ( $\text{CDCl}_3$ , 300 MHz)  $\delta$  3.62-3.78 (m, 2H), 4.07 (m, 2H), 4.39-4.45 (m, 1H), 4.53-4.55 (m, 1H), 4.88 (m, 1H), 5.21-5.32 (m, 2H), 5.84-5.95 (m, 1H).

**S9. Table S1 Crystal data for NUPF-3.**

|                                      |                                                                  |
|--------------------------------------|------------------------------------------------------------------|
| Compound                             | NUPF-3                                                           |
| CCDC number                          | 1491888                                                          |
| Empirical formula                    | $\text{C}_{80}\text{H}_{55}\text{In}_2\text{N}_9\text{O}_{19.5}$ |
| Formula weight                       | 1683.97                                                          |
| Temperature                          | 153 K                                                            |
| Wavelength                           | 0.71073 Å                                                        |
| Crystal system                       | Monoclinic                                                       |
| space group                          | $P2_1/c$                                                         |
| Unit cell dimensions                 | $a=21.038(3)$ Å $\alpha = 90^\circ$                              |
|                                      | $b=12.5112(17)$ Å $\beta = 94.509(4)^\circ$                      |
|                                      | $c=53.184(7)$ Å $\gamma = 90^\circ$                              |
| Volume                               | $13955(3)$ Å <sup>3</sup>                                        |
| Z, Calculated density                | 4, 0.802 mg/m <sup>3</sup>                                       |
| Absorption coefficient               | $0.373 \text{ mm}^{-1}$                                          |
| F(000)                               | 3408                                                             |
| Theta range for data collection      | 2.032 to $25.682^\circ$                                          |
| Reflections collected / unique       | 90761 / 26224 [Rint = 0.0783]                                    |
| Completeness to theta = 27.64        | 98.9 %                                                           |
| Absorption correction                | Semi-empirical from equivalents                                  |
| Refinement method                    | Full-matrix least-squares on $F^2$                               |
| Data / restraints / parameters       | 26224/1066/1093                                                  |
| Goodness-of-fit on $F^2$             | 1.134                                                            |
| Final R indices [ $I > 2\sigma(I)$ ] | $R1 = 0.1458$ , $wR2 = 0.3665$                                   |
| R indices (all data)                 | $R1 = 0.1696$ , $wR2 = 0.3665$                                   |
| Largest diff. peak and hole          | 2.17/-3.77 e.Å <sup>-3</sup>                                     |

## S10. References.

- [1] V. A. Blatov, A. P. Shevchenko, D. M. Proserpio, *Crystal Growth & Design* **2014**, *14*, 3576-3586.
